# Supplementary material for: Association between gut MIcrobiota, GROWth and Diet in peripubertal children from the TARGet Kids! cohort (The MiGrowD) study: protocol for studying gut microbiota at a community-based primary healthcare setting
Source: HighWire-hosted journal article supplement (doi:10.1136/bmjopen-2021-057989), 2022-05-01
Supplement: bmjopen-2021-057989supp001_data_supplement.pdf [file bmjopen-2021-057989supp001_data_supplement.pdf]

1 **Supplementary material section 1: MiGrowD study screening questionnaire**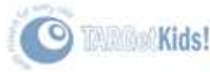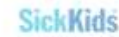**MiGrowD Study Screening Questionnaire**

Subject study ID: \_\_\_\_\_

Date: \_\_\_\_/\_\_\_\_/\_\_\_\_  
Month Day Year

Pre-consent was obtained?

 Yes  No

In the following questionnaire we would like to ask you a number questions about your child's health during the last 6 months. You will need approximately 4 minutes to complete it.

**To be enrolled in this study, the participant needs to meet all the following criteria. If you reply "Yes" to any of the exclusion criteria you might be temporarily excluded and invited again to participate, 1-3 months later.**

**Inclusion Criterion**

1. Is the child enrolled in TARGet Kids?
2. Is your child between the ages 8-12 years?

 Yes  No Yes  No**Exclusion Criteria**

1. Has your child used antibiotics (*i.e. Amoxil, Vibramycin, Augmentin*) during the last 3 months?
2. Has your child recently used any stool softeners or laxatives (*treatments for childhood constipation i.e. PEG 3350, Lactulose, Milk of magnesia, Senna*) during the last 3 months?
3. Has your child used probiotics or prebiotics during the last 3 months\*?  
Other supplements.....  
Has your child had any episodes of abdominal pain or gastrointestinal disorders in the last 3 months?
4. Does your child follow a special diet or has any dietary restrictions?  
*If yes indicate what kind of diet (i.e. weight loss program, gluten free diet etc) or restriction (i.e. lactose, gluten, etc.).....and for how long.....*

 Yes  No Yes  No Yes  No Yes  No Yes  No**Is the child eligible to participate in the study? (filled by the study personnel)** Yes  No

2

3

4

5

6

## 7 Supplementary material section 2: Stool collection instructions

8

### Collection Instructions

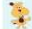

Before you start:

- ✓ Write the date and time of collection on the tube and on the label requisition form
- ✓ If possible, urinate (pee) in the toilet first
- ✓ Wash your hands

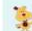

Keep in mind that you should **NOT**:

- ✓ Mix toilet paper, water, urine or soap with the sample
- ✓ Do NOT drink the liquid from the tube. If any of the liquid touches your skin or eyes, rinse thoroughly with water

Are you ready to start?

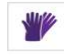

**Step 1:** Put on the gloves. Ms. Poop doesn't enjoy being touched!

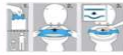

**Step 2:** Put the cellophane over the toilet seat.

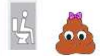

**Step 3:** Ms. Poop is eventually here! Now, let's make sure she has a safe trip! Once you are ready, you can poop directly onto the cellophane!

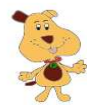

Don't forget that you have to poop on the cellophane!

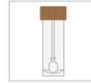

**Step 4:** Carefully unscrew the cap of the tube without spilling the liquid.

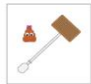

**Step 5:** Use this spoon to scoop 3 small samples from different areas of Ms. Poop.

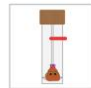

**Step 6:** Transfer Ms. Poop into the tube until the liquid reaches the line where it says "Fill To This Line" (**Do not over fill**).

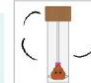

**Step 7:** Tighten the cap and shake gently until Ms. Poop is thoroughly mixed with the liquid.

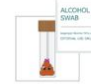

**Step 8:** Clean up any mess on the outside of the tube with the Alcohol Swab

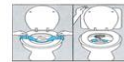

**Step 9:** Throw away the cellophane.

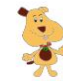

Wash your hands!!!

9
